# Tissue-specific impacts of aging and genetics on gene expression patterns in humans

Ryo Yamamoto<sup>1,2,A</sup>, Ryan Chung<sup>3,A</sup>, Juan Manuel Vazquez<sup>1</sup>, Huanjie Sheng<sup>1</sup>, Philippa Steinberg<sup>1</sup>, Nilah M Ioannidis<sup>3,4</sup>, and Peter H Sudmant<sup>1,3</sup>

<sup>1</sup>Department of Integrative Biology, University of California, Berkeley

<sup>2</sup>Bioinformatics Interdepartmental Program, University of California, Los Angeles

<sup>3</sup>Center for Computational Biology, University of California, Berkeley

<sup>4</sup>Department of Electrical Engineering and Computer Sciences, University of California, Berkeley

1 Age is the primary risk factor for many common human dis- 45  
2 eases including heart disease, Alzheimer's dementias, cancers, 46  
3 and diabetes. Determining how and why tissues age differ- 47  
4 ently is key to understanding the onset and progression of such 48  
5 pathologies. Here, we set out to quantify the relative contri- 49  
6 butions of genetics and aging to gene expression patterns from 50  
7 data collected across 27 tissues from 948 humans. We show that 51  
8 gene expression patterns become more erratic with age in sev- 52  
9 eral different tissues reducing the predictive power of expres- 53  
10 sion quantitative trait loci. Jointly modelling the contributions 54  
11 of age and genetics to transcript level variation we find that the 55  
12 heritability ( $h^2$ ) of gene expression is largely consistent among 56  
13 tissues. In contrast, the average contribution of aging to gene 57  
14 expression variance varied by more than 20-fold among tissues 58  
15 with  $R_{age}^2 > h^2$  in 5 tissues. We find that the coordinated de- 59  
16 cline of mitochondrial and translation factors is a widespread 60  
17 signature of aging across tissues. Finally, we show that while 61  
18 in general the force of purifying selection is stronger on genes 62  
19 expressed early in life compared to late in life as predicted by 63  
20 Medawar's hypothesis, a handful of highly proliferative tissues 64  
21 exhibit the opposite pattern. In contrast, gene expression varia- 65  
22 tion that is under genetic control is strongly enriched for genes 66  
23 under relaxed constraint. Together we present a novel frame- 67  
24 work for predicting gene expression phenotypes from genetics 68  
25 and age and provide insights into the tissue-specific relative 69  
26 contributions of genes and the environment to phenotypes of aging. 70  
27

28 <sup>A</sup> RY and RC contributed equally to this work  
29 aging | genetics | eQTL | Medawar

30 Correspondence: [psudmant@berkeley.edu](mailto:psudmant@berkeley.edu), [nilah@berkeley.edu](mailto:nilah@berkeley.edu)

## 31 Introduction

32 Organismal survival requires molecular processes to be car- 76  
33 ried out with the utmost precision. However, as individuals 77  
34 age many biological processes deteriorate resulting in im- 78  
35 paired function and disease. Such increases in the overall 79  
36 variance of molecular processes are predicted by Medawar's 80  
37 germline mutation accumulation theory (1), which states that 81  
38 because older individuals are less likely to contribute their ge- 82  
39 netic information to the next generation, there is reduced se- 83  
40 lection to eliminate deleterious phenotypes that appear late in 84  
41 life (2). This theory also predicts that genes expressed early 85  
42 in life should be under increased selective constraint compar- 86  
43 ed to genes expressed late in life. However, a key chal- 87  
44 lenge remains in both quantifying age-associated changes in 88

biological processes across tissues and identifying how ge-  
netic variation influences such changes.

At the organismal level, age-associated changes in the het-  
erogeneity of gene expression between individuals have been  
observed for a handful of genes in humans (3). In an anal-  
ysis of gene expression in monozygotic (identical) twins, 42  
genes showed age-associated differences in gene expression,  
suggesting a role for the environment in modulating gene ex-  
pression with age (2, 3). Similarly, the proportion of expres-  
sion quantitative trait loci (eQTLs) detected from blood in 70  
year olds declined by 2.7% when they were resampled at 80  
years old (4). However, the extent of this phenomenon, both  
across genes and tissues, remains unclear (5). Age-associated  
increases in the heterogeneity of gene expression have also  
been observed at the level of individual cell-to-cell variation;  
however, only some cell types appear to be impacted (6). In  
a recent study of immune T-cells from young and aged indi-  
viduals, no difference in cell-to-cell variability was observed  
in unstimulated cells, however, upon immune activation the  
older cells appeared more heterogeneous (7). It is not known  
why some cell-types and not others may be more likely to  
exhibit increased cellular variability.

The relationship between the age at which a specific gene  
is expressed and the force of purifying selection has also re-  
cently been explored across a number of species (8, 9). These  
analyses have broadly confirmed that, on average, genes ex-  
pressed later in life are under less constraint compared to  
those expressed early in life. However, how these patterns  
vary across different tissues and are impacted by genetic vari-  
ation has not been systematically explored.

Here we set out to understand how aging affects the molecu-  
lar heterogeneity of gene expression and to model the relative  
impact of age and genetic variation on this phenotype across  
tissues. First, using gene expression data from 948 individ-  
uals in GTEx V8 (10), we show that eQTLs are less predic-  
tive in older individuals, however to a different extent across  
various tissues. We show that gene expression heterogene-  
ity between individuals increases with age in these tissues.  
Using a regularized linear model-based approach to jointly  
model the impact of both age and genetic variation on gene  
expression we find that while the average heritability of gene  
expression is consistent across tissues, the average contribu-  
tion of age varies substantially. Furthermore, while the ge-  
netic regulation of gene expression is similar across tissues,

age-associated changes in gene expression are highly tissue-specific in their action. We use this joint model to identify each gene's age of expression and show that while in most tissues late-expressed genes do tend to be under more relaxed selective constraint, among a handful of highly proliferative tissues the opposite trend holds.

## Results

### Expression quantitative trait loci exhibit varying predictive power in old and young individuals across several different tissues.

To gain insight into how gene regulatory programs might be impacted by aging we analyzed transcriptomic data collected across multiple tissues from 948 humans (GTEx version 8) (10). We hypothesized that aging might dampen the effect of expression quantitative trait loci (eQTLs) due to factors such as increased environmental variance or molecular infidelity (Fig. 1A). To test this hypothesis we first classified individuals into *young* and *old* age groups conservatively grouping individuals above and below the median age (55 years old, Fig. S1), respectively, restricting our analyses to tissues with at least 100 individuals in both groups (27 tissues in total, Fig. S2, Table S1). In each tissue we down-sampled to match the sample size of old and young individuals while additionally controlling for co-factors such as ancestry and technical confounders (methods). Of note, a common approach to controlling for unobserved confounders in large gene expression experiments is to probabilistically infer hidden factors using statistical tools such as PEER (11). We noticed that many of the GTEx PEER factors were significantly correlated with sample age, with the top three correlated PEER factors having a Pearson  $r$  of 0.33, -0.21, and -0.15 (Fig. S3). To prevent loss of age related variation, we recalculated a corrected set of PEER factors that were independent of sample age (Methods). We then assessed the significance of GTEx eQTLs in the young and old cohorts respectively, comparing the distribution of P-values over all genes between old and young individuals (Fig. 1A). In 20 out of 27 (74%) of the assessed tissues, the P-value distribution was significantly different between young and old individuals with genotypes more predictive of expression in younger individuals in 12/20 cases (e.g. Fig. 1D). These results were largely identical when the analyses were performed with the original non-corrected PEER factors (18/27 tissues, Fig. S4). These results suggest that the predictive power of eQTLs is impacted by the sample age across the vast majority of tissues. Furthermore this effect is more pronounced in older samples compared with younger samples.

### Age-associated increases in gene expression heterogeneity reduce gene expression heritability.

We hypothesized that the reduced predictive power of eQTLs in some older tissues might be in part due to an overall increase in expression heterogeneity in these tissues, potentially as a result of increased environmental variance. To test if such an effect would broadly affect expression across all genes in a tissue (Fig. 2A) we calculated the distribution of pairwise distances among individual's tissue-specific gene expression

profiles using the Jensen-Shannon Divergence (JSD) (12, 13) as a distance metric. The JSD is a robust distance which is less impacted by outliers compared to other methods (e.g. Euclidean distance) (13). Comparing the distribution of pairwise differences in transcriptional profiles within distinct age groups allows us to determine if gene expression signatures are more similar among *younger* individuals versus among *older* individuals.

We compared the mean difference in gene expression distances among old and young individuals as well as the slope of the inter-individual JSD and when grouping individuals into six bins spanning 20-80 years old (see methods, Fig. 2B, 2C). These two strategies yielded highly similar results (Fig. 2B  $R=0.8$ ) and identified a cluster of 12 tissues exhibiting robust increases in the average inter-individual expression distance as a function of age (e.g. Fig. 2C). Our JSD analysis of old and young individuals was also negatively correlated with the results from our analysis of eQTLs across old and young individuals (Fig. S5,  $R=-0.48$ ,  $P=0.01$ ) highlighting that tissues with age-associated increases in inter-individual heterogeneity were likely to also exhibit reductions in the proportion of variance described by eQTLs. Conversely, tissues in which eQTLs explained a higher proportion of gene expression variance in older individuals exhibited a decrease in inter-individual gene expression variation.

To expand our eQTL analyses to account for the combined impact of nearby SNPs, we utilized the multi-SNP regularized linear model of PrediXcan (14). This model has the benefit of combining genetic effects across many loci, instead of examining just a single eQTL variant. This combined genetic contribution to gene expression variance results in an estimate of the heritability ( $h^2$ ) for each gene. We applied this model independently in old and young individuals to quantify  $h^2$  and found that the average per-gene difference in  $h^2$  between old and young individuals was strongly negatively correlated with the difference in JSD between samples ( $R=0.6$ ,  $P=9.9e-4$ , Fig. 2D, Fig. S6). Together these results suggest that across numerous tissues aging is associated with an overall increase in gene expression heterogeneity. This increased expression variance drives a reduction in the average heritability of gene expression across these tissues.

### Jointly modeling the impact of age and genetics on gene expression identifies distinct, tissue-specific patterns of aging.

A more powerful approach to understand how both genetics and age impact gene expression variation is to jointly model these factors simultaneously. We set out to extend the regularized linear model to incorporate an age factor (Fig. 3A) allowing us to parse apart the individual contributions of genetics ( $R_{\text{genetics}}^2$  or  $h^2$ ), age ( $R_{\text{age}}^2$ ), and the environment ( $R_{\text{environment}}^2$ ), to the expression variance of each gene (e.g. Fig. 3B, Fig. 3C). We define  $R_{\text{environment}}^2$  as all sources of variation not captured by  $h^2$  and  $R_{\text{age}}^2$ . Estimates of  $h^2$  in our extended model were highly consistent with those in the original PrediXcan approach (Fig. S7).

Employing our model across each tissue independently we find that average heritability of gene expression was largely

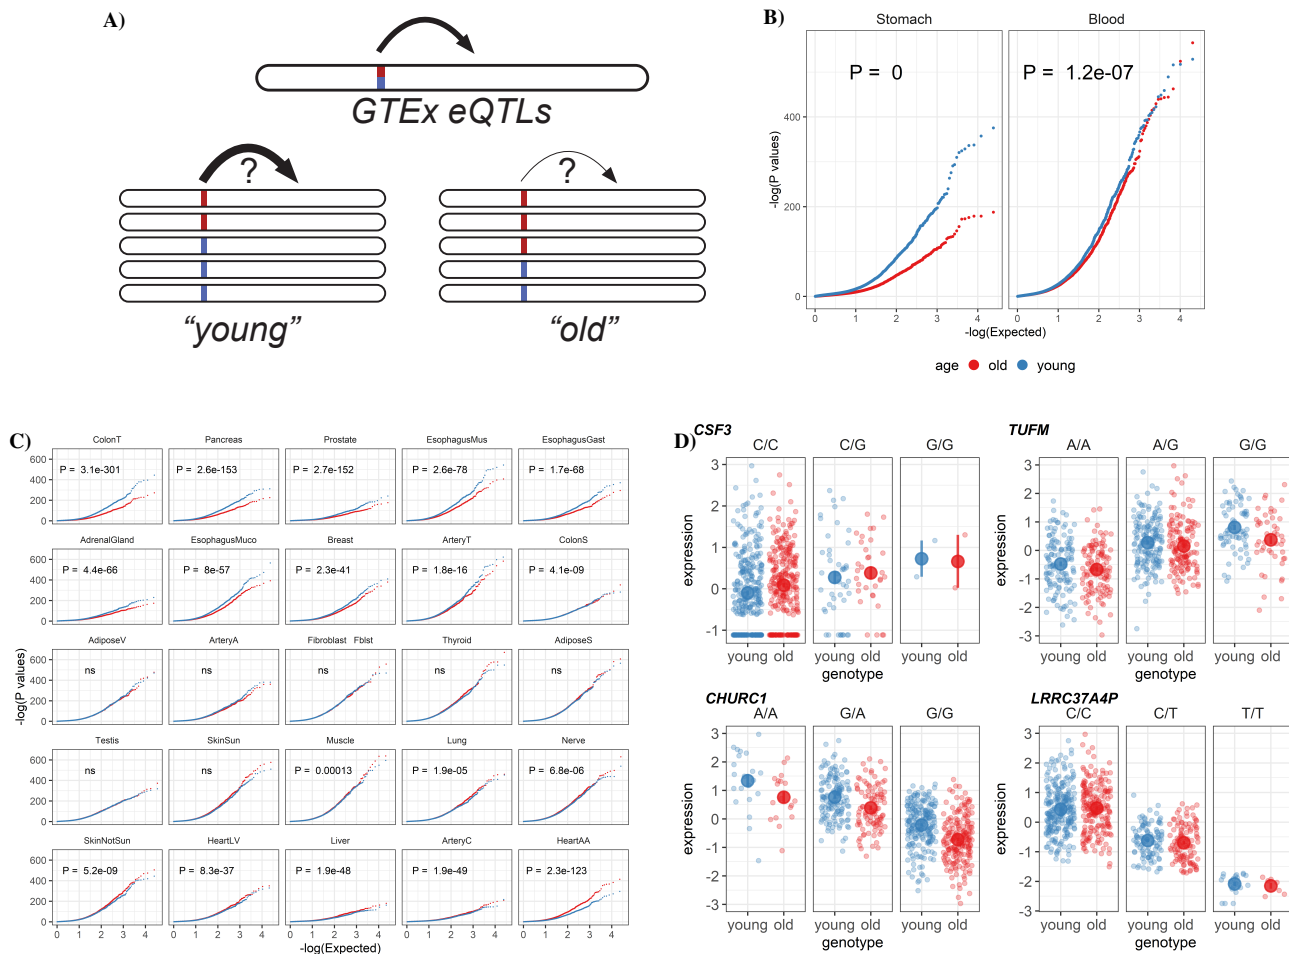

**Fig. 1. eQTLs become less explanatory with age in many tissues.** **A)** A hypothetical model of the differing power to detect eQTLs in old and young cohorts. **B)** QQ plots of eQTL p-values (plotted as  $-\log(P)$ ) for old (red) and young (blue) individuals from a linear model correlating expression with the lead SNP for each gene in blood and stomach tissue and **C)** all other tissues (Table S2). **D)** Examples of gene expression binned by genotype and age for four genes in which eQTLs are less explanatory in older individuals in whole blood.

200 consistent among tissues ranging from 2.9%-5.7% with 40% 222  
 201 of genes having an  $h^2 > 10\%$  in at least one tissue (Fig. 3D, 223  
 202 S8). Thus, while the variation in expression of many indi- 224  
 203 vidual genes is strongly influenced by genetics, on average, 225  
 204 genetics explains a small proportion of overall gene expres- 226  
 205 sion variation. In contrast, the average contribution of aging 227  
 206 to gene expression varied more than 20-fold among tissues  
 207 from 0.4%-7.9% with the average  $R_{\text{age}}^2$  greater than the av- 228  
 208 erage  $h^2$  in 5 tissues. Among these 5 tissues the expression 229  
 209 of 39-54% of genes was more influenced by age than by ge- 230  
 210 netics (i.e.  $R_{\text{age}}^2 > h^2$ , Fig. S9) and across all tissues 45% of 231  
 211 genes had an  $R_{\text{age}}^2 > 10\%$  in at least one tissue. Assessing the 232  
 212 tissue-specificity of these trends on a per-gene basis we found 233  
 213 while the estimated heritability of gene expression tended to 234  
 214 be similar among different tissues, the age-associated compo- 235  
 215 nent exhibited significantly more tissue specificity ( $P < 2.2e-$  236  
 216  $16$ , Fig. 3E). We note that the widespread signatures of 237  
 217 age-associated gene expression variance that we identify are 238  
 218 virtually undetectable when using the GTEx-provided PEER 239  
 219 factors. Just 1.84% of the age-associated genes we identify 240  
 220 have nonzero age coefficient when using these GTEx PEER 241  
 221 factors (Fig. S10). Our model thus widely expands the util- 242  
 243

ity of the GTEx dataset and exploration of critical biological  
 signatures of aging. Together these results imply that age-  
 associated patterns of gene expression exhibit substantially  
 more tissue specificity than those that are influenced by ge-  
 netics and among several tissues age plays a much stronger  
 role in driving gene expression patterns than genetics.

### Coordinated decline of mitochondrial and translation factors is a widespread signature of aging across tissues.

To understand the underlying biological implications of age-associated gene expression changes we applied gene set enrichment analysis (GSEA)(15) to each tissue independently, ranking genes either by the relative contribution of genetics ( $h^2$ ) or aging ( $R_{\text{age}}^2$ ). Comparing the distribution of P-values from enriched GO-annotations we found that pathways enriched for age-associated variance were substantially more enriched for significance than pathways associated with genetic-associated variance (e.g. Fig. 4A). We found more age-associated pathway enrichment even in tissues for which the average age-associated contribution to gene expression was low (e.g. Pancreas, Fig. S11). This implies that while age-associated changes in gene expression vary widely in their magnitude among tissues, these changes

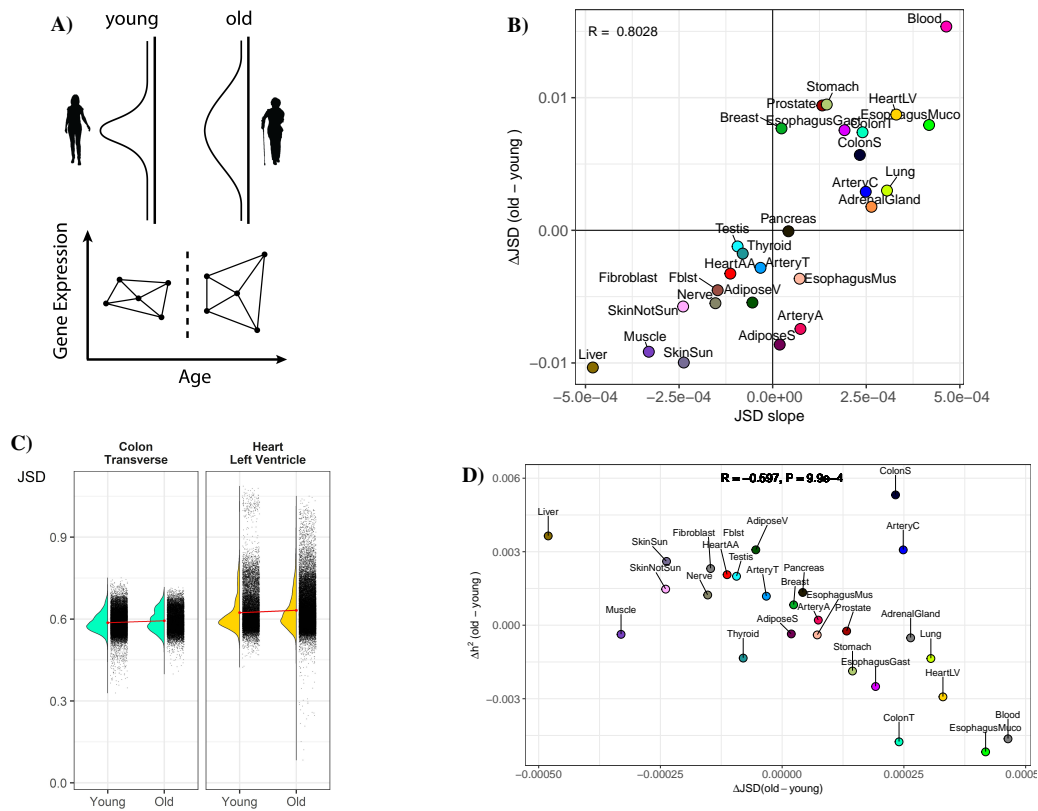

**Fig. 2. Inter-individual gene expression heterogeneity increases with age for a subset of tissues.** **A)** Hypothesized age-associated increase in gene expression heterogeneity (top) and our approach for quantifying the inter-individual expression distance with age using the Jensen Shannon Divergence metric (JSD) for age-binned individuals (bottom). **B)** Consistency of measuring the average age-associated change in gene expression heterogeneity across a tissue using a binary binning strategy (y-axis,  $JSD_{old} - JSD_{young}$ ) or a 6 bin strategy (x-axis, slope of JSD across 6 bins). **C)** The distributions of JSD distances for two tissues in old and young bins. **D)** The relationship between gene expression heterogeneity and the difference in expression heritability between old and young individuals.

244 consistently impact critical biological processes. A GSEA 270  
 245 enrichment analysis of genes ranked by the tissue-averaged 271  
 246 slope of the age-associated trend ( $\beta_{age}$ ) highlighted several 272  
 247 key aging-associated pathways. Pathways associated with 273  
 248 various mitochondrial and metabolic processes and transla- 274  
 249 tion were enriched for having  $-\beta_{age}$  values, implying age- 275  
 250 associated decreases (Fig. 4B). A single immune pathway, 276  
 251 the interferon-gamma response was enriched having  $+\beta_{age}$  277  
 252 values (Fig. 4B). An additional 18 immune pathways were 278  
 253 identified as having age-associated increases in gene expres- 279  
 254 sion using a more lenient significance threshold ( $FDR < 0.05$ ) 280  
 255 (Fig. S12). In contrast, no pathways were significantly en-  
 256 riched when genes were ranked by average  $h^2$ .

257 To further explore the functional impact of age-associated 282  
 258 gene expression changes we compared the  $R^2_{age}$  of all 283  
 259 nuclear-encoded mitochondrial genes ( $n=1120$ , (16)), and 284  
 260 translation initiation, elongation, and termination factors, 285  
 261 across tissues (Fig. 4C, Fig. S13). Genes in these path- 286  
 262 ways were exceptionally enriched for age-associated gene ex- 287  
 263 pression across several tissues. In some cases  $>10\%$  of the 288  
 264 average expression variation of mitochondrial or translation 289  
 265 factor genes could be explained by age.  $\beta_{age}$  was consis- 290  
 266 tently negative in these mitochondrial and translation factor 291  
 267 genes (Fig. 4D) highlighting that genes in these pathways 292  
 268 exhibit a systematic decrease in expression as a function of 293  
 269 age. Overall across tissues an average of 36% of all mi- 294

tochondrial genes (406/1120), and 35% of translation fac-  
 tors (119/337) exhibited age-associated declines, however in  
 some tissues these proportions exceeded 60%. In contrast,  
 the only pathway associated with age-associated increases  
 in expression, interferon-gamma response genes, was largely  
 specific to blood and arterial tissue (Fig. 4C), likely due to the  
 role of this pathway in immune cells. Together these results  
 demonstrate that the coordinated decline of mitochondrial  
 genes and translation factors is a widespread phenomenon of  
 aging across several tissues with potential phenotypic conse-  
 quences.

**Distinct evolutionary signatures of gene expression patterns influenced by aging and genetics.** Evolutionary theory predicts that due to the increased impact of selection in younger individuals, genes that increase as a function of age ( $\beta_{age} > 0$ ) should be under reduced selective constraint compared to genes that are highly expressed in young individuals ( $\beta_{age} < 0$ ), a theory of aging known as *Medawar's hypothesis* (1) (Fig. 5A). Several recent studies have demonstrated the generality of this trend across species (8, 9, 17) however the tissue-specificity of this theoretical prediction has not been explored. We sought to test the generality of this trend across different tissues by comparing  $\beta_{age}$  with the level of constraint on genes, quantified as the probability loss of function intolerance (pLI) score from gnomAD



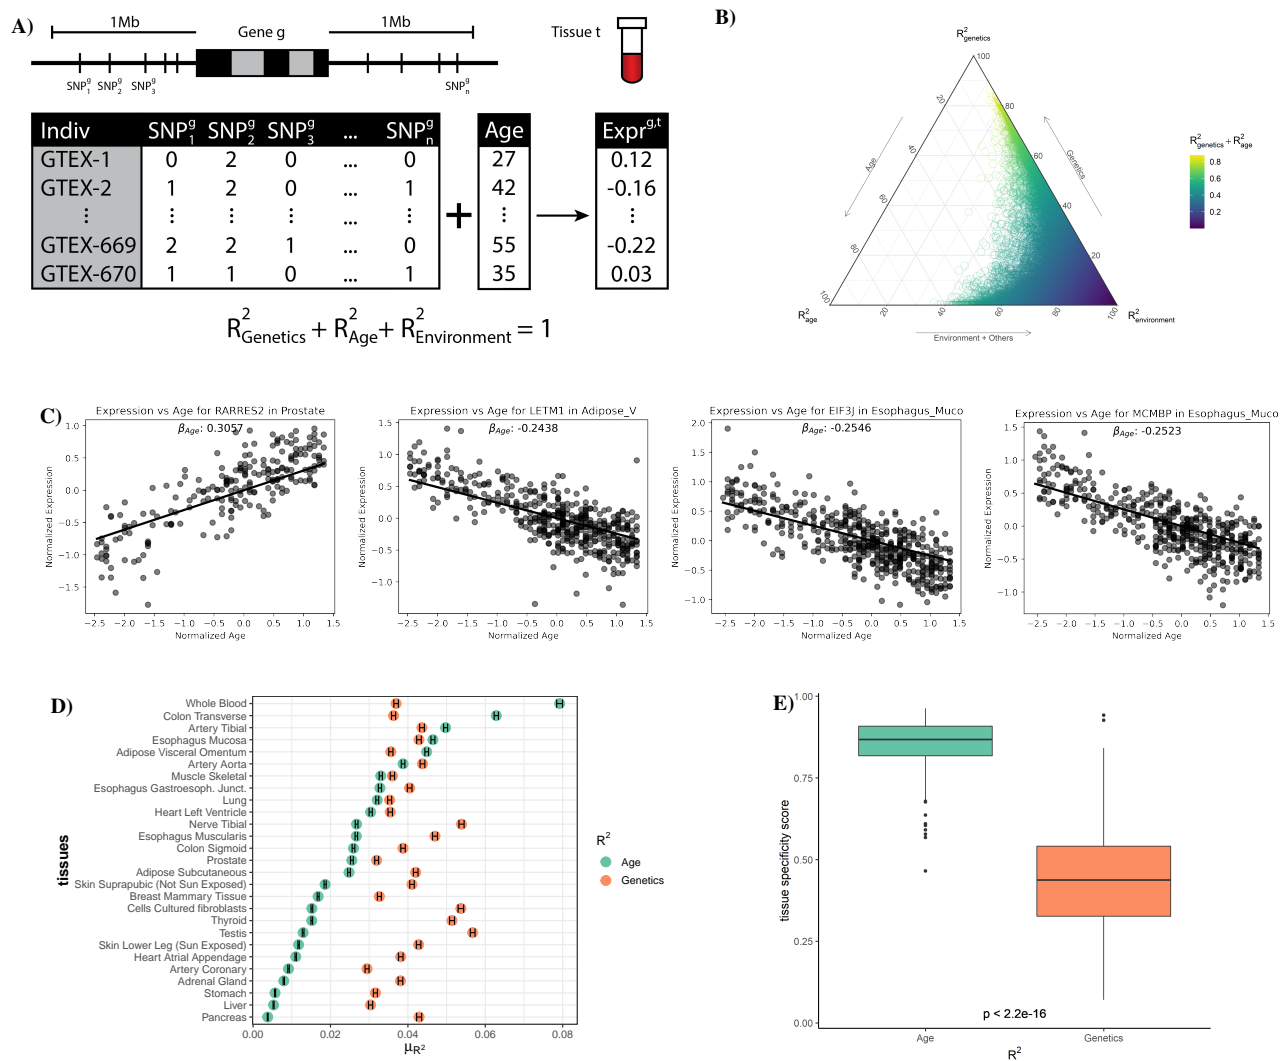

**Fig. 3. A joint predictive model of gene expression identifies tissue-specific contributions of age and genetics to transcript levels.** **A)** A schematic of our multi-SNP gene expression association model incorporating sample age. Common SNPs around each gene  $g$  are used in combination with an individual's age to predict expression within tissue  $t$ . Using this trained model, variation in gene expression can be separated into three parts: the components explained by genetics ( $R^2_{\text{genetics}}$  or  $h^2$ ), by age ( $R^2_{\text{age}}$ ) and by all other factors ( $R^2_{\text{environment}}$ ). **B)** Ternary plot of the proportion of each genes expression variance explained by age, genetics and the environment. **C)** Plot of normalized expression vs age for four genes with significant age-correlated expression. Line shows fitted  $\beta_{\text{age}}$  from regularized linear model. **D)** Point estimates of the mean  $R^2_{\text{age}}$  and  $h^2$  for each tissue, error bar indicating confidence interval for the estimate. **E)** The tissue specificity score of  $R^2$  across 27 tissues for each gene from either age genetics.

(18). As expected, across the vast majority of tissues  $\beta_{\text{age}}$  was significantly negatively correlated with pLI (Fig. 5B, 5C), in line with Medawar's hypothesis. However, five tissues exhibited significant signatures in the opposite direction including prostate, transverse colon, breast, whole blood, and lung tissue ( $P < 10^{-3}$ ). These five tissues with *non-Medawarian* trends are driven by highly constrained, functionally important genes being expressed at a higher rate in older individuals (Fig. S14). Using  $dN/dS$  (19) as an alternative metric of gene constraint yielded highly correlated results ( $R = -0.72$ ,  $P = 2.5e-5$  Fig. S15, S16).

To explore why these five tissues might exhibit distinctive evolutionary signatures of aging we compared the distribution of significant  $\beta_{\text{age}}$  parameters between *Medawarian* and *non-Medawarian* tissues among different *hallmark pathways* (20). We found 11 signatures exhibiting significantly increased  $\beta_{\text{age}}$  (FDR < 0.01) compared to *non-Medawarian* tissues

(Fig. 5D, 5E) including DNA-damage, TGF- $\beta$  signalling, MYC targets, and epithelial-to-mesenchymal transition pathways most prominently. All of these signatures are broadly correlated with cellular proliferation, differentiation, and cancer. These results highlight that gene expression patterns in tissues and cell-types that proliferate throughout the course of an individual's life may be subjected to distinct evolutionary pressures.

We also explored the relationship between gene expression heritability and constraint. Across all tissues  $h^2$  was significantly negatively correlated with pLI (27/27 tissues, P-value  $< 10^{-3}$ ) (Fig. 5F, S17). While this trend was consistent across tissues, intriguingly it was strongest in heart tissues. The exception was liver, which also had the highest average  $R^2_{\text{environment}}$  among all tissues, which was only nominally significant after multiple test correction ( $P < 0.00185$ ). These results indicate that genes in which the variance in expression

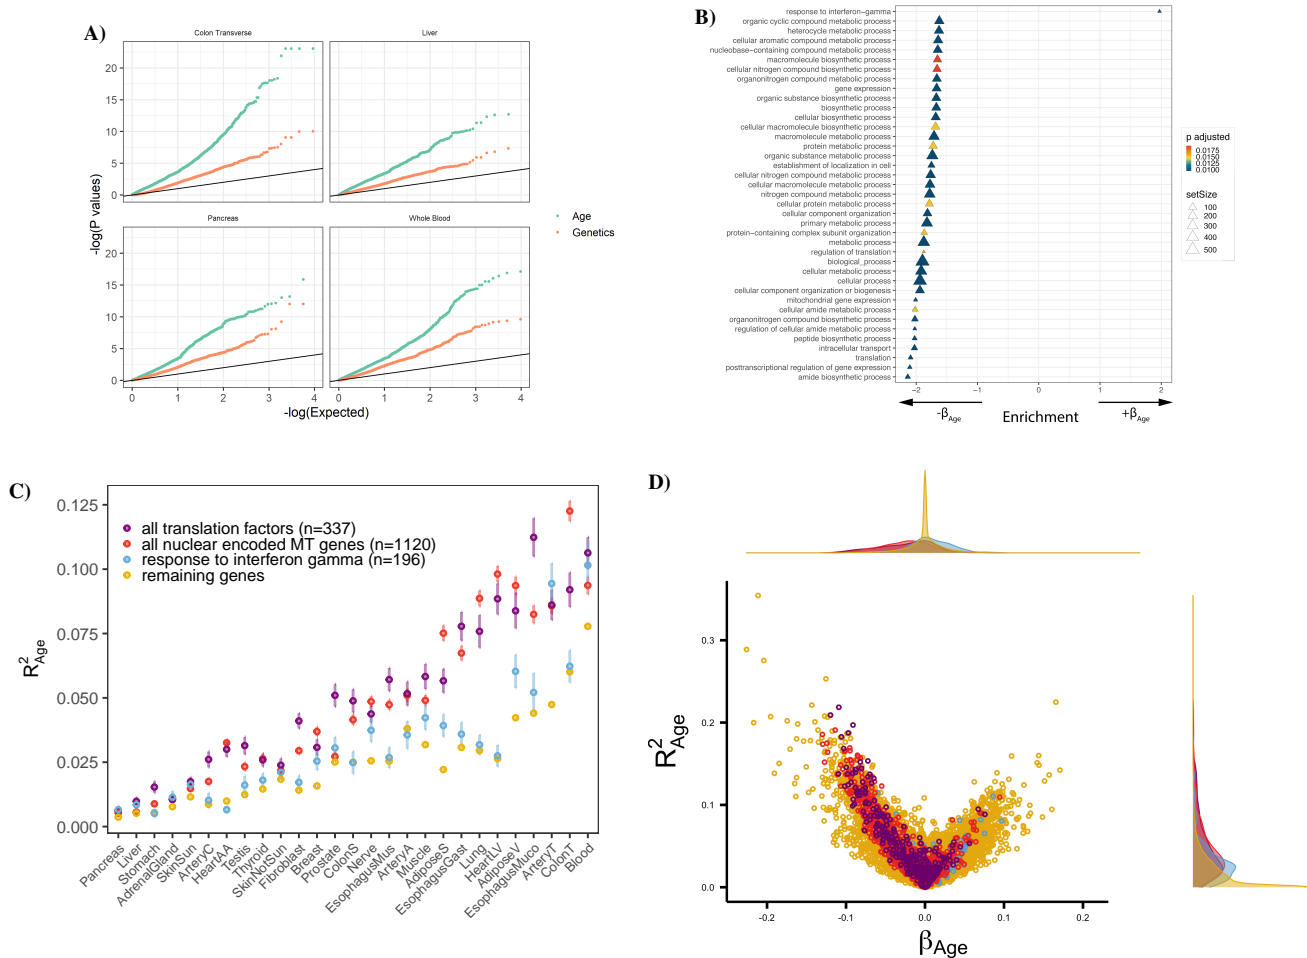

**Fig. 4. Functional analysis of age-related genes reveals enriched biological processes.** **A)** A QQ plot of p-values for pathways tested for enrichment using gene set enrichment analysis (GSEA) with genes ranked by either  $h^2$  or  $R^2_{Age}$  in four example tissues. **B)** GSEA enrichments from genes ranked by the mean  $\beta_{Age}$  across tissues. Pathways with a correct  $P < 0.02$  are shown. **C)** Average gene expression variance explained by age for mitochondrial (MT) genes (red), translation factor genes (purple), interferon gamma genes (blue) and remaining genes (yellow) across all tissues. **D)** Volcano plot of the variance explained by age vs  $\beta_{Age}$  for mitochondrial, translation factors, interferon gamma factors, and remaining genes. Density plot of each axis show on top and right.

329 is heritable tend to be under significantly less functional con- 349  
 330 straint. In contrast, highly conserved genes that are intolerant 350  
 331 to mutation are significantly less likely to exhibit heritable 351  
 332 variation in gene expression, likely because their expression 352  
 333 levels are additionally under constraint. 353

## 334 Discussion

335 Studying age-associated changes in gene expression provides 357  
 336 critical insights into the underlying biological processes of 358  
 337 aging. Here, we set out to quantify the relative contributions 359  
 338 of aging and genetics to gene expression phenotypes across 360  
 339 different human tissues. Our study finds that the predictive 361  
 340 power of eQTLs is significantly impacted by age across sev- 362  
 341 eral different tissues and that his effect is more pronounced in 363  
 342 older individuals. These results extend upon previous work 364  
 343 examining blood tissue (4) and highlight the varied impact of 365  
 344 aging on eQTLs among different tissues. We show that this 366  
 345 result is likely to be in part due to an increase in the inter- 367  
 346 individual heterogeneity of gene expression patterns among 368  
 347 older individuals, potentially as a result of the increased im- 369  
 348 pact of the environment. However, our study is limited in 370

it's focus on bulk-tissue transcriptomic data. Early evidence  
 from single cell studies already suggests that differences in  
 gene expression heterogeneity vary among cell types of tis-  
 sues as a function of age (6, 7, 21, 22). While these studies  
 lack sufficient individual sample sizes and genetic diversity  
 for the statistical approaches used herein, it is possible that  
 in the future the availability of larger datasets will facilitate  
 studying these phenomena at the single-cell level. The exten-  
 sive tissue heterogeneity we observe suggests that patterns of  
 aging will exhibit substantial cell-type specificity.

We also present a novel approach to jointly model the impact  
 of genetics and aging on gene expression variance to parse  
 out the individual contributions of each of these factors. The  
 increased complexity of our model has little impact on its  
 accuracy with our expression heritability estimates strongly  
 correlated with previous heritability measures across all tis-  
 sues (mean Pearson's  $r$  0.89, Fig. S7). Using this model  
 we show that age exhibits exceptionally varied affects on dif-  
 ferent tissues, and indeed, in several tissues age contributes  
 more to gene expression variance on average than genetics.  
 These results also highlight a widespread coordinated sig-  
 nature of age-associated decline in mitochondrial and trans-

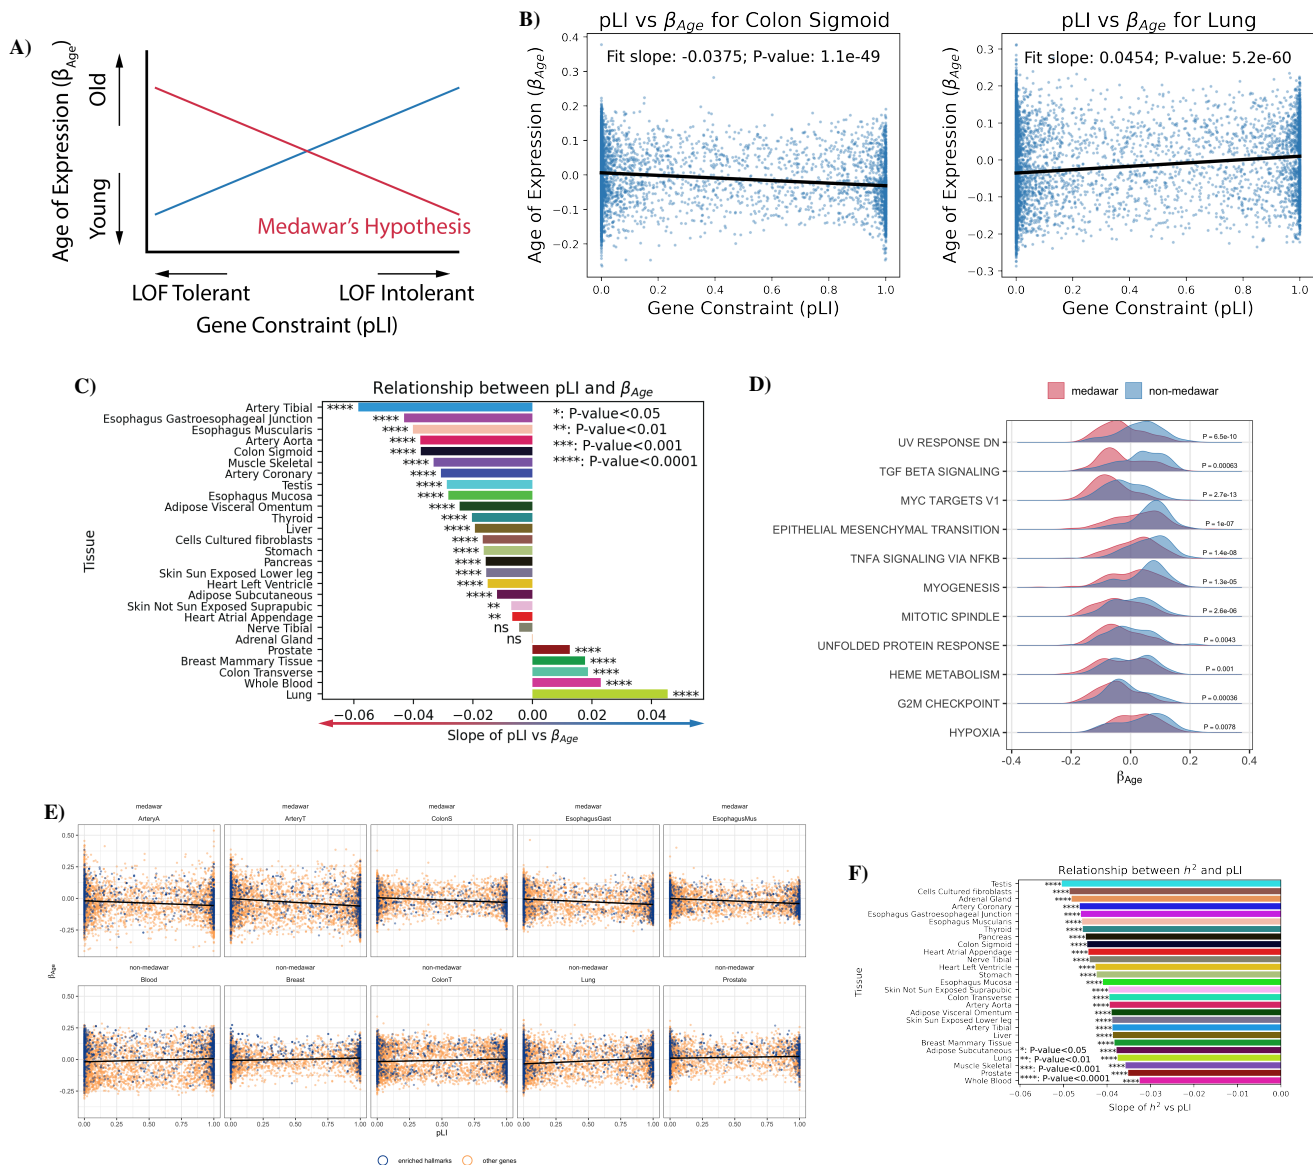

**Fig. 5. Tissue-specific evolutionary signatures of aging.** **A)** The expected relationship across genes between the per-gene age-associated slope of gene expression ( $\beta_{Age}$ ) and a genes level of constraint (measured by probability loss of function intolerance - pLI). Medawar's hypothesis predicts a negative relationship (shown in red) between the time of expression and the level of constraint. **B)**  $\beta_{Age}$  across genes plotted as a function of pLI for a tissue exhibiting a *Medawarian* signature, and a *non-Medawarian* signature. **C)** The slope of the relationship between  $\beta_{Age}$  and constraint across all tissues. **D)** Hallmark pathways in which the  $\beta_{Age}$  was significantly different between *Medawarian* and *non-Medawarian* tissues. **E)** The relationship between  $\beta_{Age}$  and pLI among tissues showing the strongest *Medawarian* and *non-Medawarian* signatures with genes in pathways from (D) highlighted in blue. **F)** The slope of the relationship between constraint (pLI) and heritability ( $h^2$ ) across tissues.

371 lation factors. Dysregulation in mitochondrial function and 385  
 372 ribosome biogenesis have been documented as key players 386  
 373 in aging, (23, 24), however our results highlight the tissue- 387  
 374 specificity of these trends. Our model also allows us to quan- 388  
 375 tify the tissue-specific evolutionary context of age-associated 389  
 376 gene expression changes. We corroborate the inverse relation- 390  
 377 ship between age-at-expression and constraint, as predicted 391  
 378 by Medawar's hypothesis and recently documented by 392  
 379 others (8, 9, 17) across the vast majority of tissues. However, 393  
 380 we also surprisingly identify five tissues which exhibit the op- 394  
 381 posite pattern and show that age-associated signatures of in- 395  
 382 creased proliferation and cancer are enriched in these tissues. 396  
 383 These results highlight the distinct evolutionary forces that 397  
 384 act on late-acting genes expressed in highly proliferative cell-

types. Future work extending these analyses to the single-cell 385  
 level will provide further insights into the cell-type-specific 386  
 age-associated patterns of constraint, both in terms of gene 387  
 expression levels and at the protein-coding level. 388

Overall this work has several important implications. Our re- 389  
 sults shed light on recent work on the prediction accuracy of 390  
 polygenic risk scores (PRS) (25) which found that numerous 391  
 factors, including age, sex, and socioeconomic status can pro- 392  
 foundly impact the prediction accuracy of such scores even 393  
 in individuals with the same genetic ancestry. Our results 394  
 highlight that genetics are less predictive of expression phe- 395  
 notypes in several different tissues in older individuals, po- 396  
 tentially playing a role in differential PRS accuracy between 397  
 young and old individuals. This also has important implica-

tions for disease association and prediction approaches that leverage expression quantitative trait loci to prioritize variants (e.g. TWAS (26)). If a significant proportion of eQTLs exhibit age-associated biases in their effect size in a tissue of interest, then these approaches may be less powerful when applied to diseases for which age is a primary risk factor such as heart disease, Alzheimer's dementias, cancers, and diabetes.

The critical role of aging as a risk factor for many common human diseases underscores the importance of understanding its impact on cellular systems at the molecular level. Together our analyses provide novel insights into tissue-specific patterns of aging and the relative impact of genetics and aging on gene expression. We anticipate that future studies across tissues and cells of gene expression, chromatin structure, and epigenetics will further elucidate how both programmed and stochastic processes of aging drive human disease.

## Supplementary Note 1: Methods

**Data collection age groupings.** We downloaded gene expression data for multiple individuals and tissues from GTEx V8 (10), which were previously aligned and processed against the hg19 human genome. Tissues were included in the analysis if they had >100 individuals in both the age  $\geq 55$  and <55 cohorts described below (Fig. S2). To compare gene expression heritability across individuals of different ages, for some analyses we split the GTEx data for each tissue into two age groups, "young" and "old," based on the median age of individuals in the full dataset, which was 55 (Fig. S1). Within each tissue dataset, we then equalized the number of individuals in the young and old groups by randomly down-sampling the larger group, to ensure that our models were equally powered for the two age groups.

**PEER factor analysis.** We analyzed existing precomputed PEER factors available from GTEx to check for correlations between these hidden covariates and age. In particular, we fit a linear regression between age and each hidden covariate and identified significant age correlations using an F-statistic (Fig. S3). Because some of the covariates were correlated with age, we generated new age-independent hidden covariates of gene expression to remove batch and other confounding effects on gene expression while retaining age related variation. In particular, we first removed age contributions to gene expression by regressing gene expression on age and then ran PEER on the age-independent residual gene expression to generate 15 age-independent hidden PEER factors.

**Quantifying the effect of eQTLs on gene expression in different age groups.** Using the binary age groups defined above, we assessed the relative significance of eQTLs in old and young individuals by carrying out separate assessment of eQTLs identified by GTEx. For each gene in each tissue and each age group, we regressed the GTEx pre-normalized expression levels on the genotype of the lead SNP (identified by GTEx) using 5 PCs, 15 PEER factors, sex, PCR protocol and sequencing platform as covariates, following the GTEx best

practices. We confirmed our results using both our recomputed PEER factors as well as the PEER factors provided by GTEx (Fig. S4). To test for significant differences in genetic associations with gene expression between the old and young age groups, we compared the p-value distributions between these groups for all genes and all SNPs in a given tissue using Welch's t-test.

**Jensen-Shannon Divergence as a distance metric between transcriptome profiles.** To quantify differences in gene expression between individuals, we computed the pairwise distance for all pairs of individuals in an age group using the square root of Jensen-Shannon Divergence (JSD) distance metric, which measures the similarity of two probability distributions. Here we applied JSD between pairs of individuals' transcriptome vectors containing the gene expression values for each gene, which we converted to a distribution by normalizing by the sum of the entries in the vector. For two individuals' transcriptome distributions, the JSD can be calculated as:

$$\text{JSD}(P_1, P_2) = H\left(\frac{1}{2}P_1 + \frac{1}{2}P_2\right) - \frac{1}{2}(H(P_1) + H(P_2)) \quad (1)$$

where  $P_i$  is the distribution for individual  $i$  and  $H$  is the Shannon entropy function:

$$H(X) = -\sum_{i=1}^n P(x_i) \log_2(P(x_i)) \quad (2)$$

JSD is known to be a robust metric that is less sensitive to noise when calculating distance compared to traditional metrics such as Euclidean distance and correlation. It has been shown that JSD metrics and other approaches yield similar results but that JSD is more robust to outliers (12). The square root of the raw JSD value follows the triangle inequality, enabling us to treat it as a distance metric.

**Slope of JSD versus age.** In addition to comparing JSD between the two age groups defined above, "young" and "old", we also binned all GTEx individuals into 6 age groups, from 20 to 80 years old with an increment of 10 years. We then computed pairwise distance and average age for each pair of individuals within each bin using the square root of JSD as the distance metric. We applied a linear regression model of JSD versus age to obtain slopes, confidence intervals, and p-values.

**Multi-SNP gene expression prediction.** We used a multi-SNP gene expression prediction model based on PrediXcan (14) to corroborate our findings from the eQTL and JSD analyses on the two age groups, "young" and "old". For each gene in each tissue, we trained a multi-SNP model separately within each age group to predict individual-level gene expression.

$$Y_{g,t} = \sum_i \beta_{i,g,t} X_i + \epsilon \quad (3)$$

Where  $\beta_{i,g,t}$  is the coefficient or effect size for SNP  $X_i$  in gene  $g$  and tissue  $t$  and  $\epsilon$  includes all other noise and environmental effects. The regularized linear model for each gene



500 considers dosages of all common SNPs within 1 megabase 547  
 501 of the gene's TSS as input, where common SNPs are de- 548  
 502 fined as MAF > 0.05 and Hardy-Weinberg equilibrium  $P >$   
 503 0.05. We removed covariate effects on gene expression prior  
 504 to model training by regressing out both GTEx covariates  
 505 and age-independent PEER factors (described above). Co-  
 506 efficients were fit using an elastic net model which solves the  
 507 problem ((27)):

$$\min_{\beta_0, \beta} \frac{1}{2N} \sum_{j=1}^N (Y_j - \beta_0 - X_j^T \beta)^2 + \lambda \left( \frac{1-\alpha}{2} \|\beta\|_2^2 + \alpha \|\beta\|_1 \right) \quad (4)$$

508 The minimization problem contains both the error of our 555  
 509 model predictions  $(Y_j - \beta_0 - X_j^T \beta)^2$  and a regularization 556  
 510 term  $\lambda \left( \frac{1-\alpha}{2} \|\beta\|_2^2 + \alpha \|\beta\|_1 \right)$  to prevent model overfitting. 557  
 511 The elastic net regularization term incorporates both L1 558  
 512 ( $\|\beta\|_1$ ) and L2 ( $\|\beta\|_2^2$ ) penalties. Following PrediXcan,  
 513 we weighted the L1 and L2 penalties equally using  $\alpha = 0.5$  559  
 514 (14). For each model, the regularization parameter  $\lambda$  was 560  
 515 chosen via 10-fold cross validation. The elastic net models 561  
 516 were fit using Python's glmnet package and  $R^2$  was eval- 562  
 517 uated using scikit-learn. From the trained models for each 563  
 518 gene, we evaluated training set genetic  $R^2$  (or  $h^2$ ) for the two 564  
 519 age groups and subtracted  $h_{\text{young}}^2 - h_{\text{old}}^2$  to get the differ- 565  
 520 ence in gene expression heritability between the groups. We 566  
 521 compared this average difference in heritability to the mean 567  
 522  $JSD_{\text{old}} - JSD_{\text{young}}$  and  $\log(P_{\text{old}}) - \log(P_{\text{young}})$  using P- 568  
 523 values from the eQTL analyses across genes. 569

524 **Joint model for expression prediction using SNPs and** 571  
 525 **age.** To uncover linear relationships between gene expres- 572  
 526 sion and both age and genetics, we built a set of gene expres- 573  
 527 sion prediction models using both common SNPs and stan- 574  
 528 dardized age as input. An individual's gene expression level 575  
 529  $Y$  for a gene  $g$  and tissue  $t$  is modeled as:

$$Y_{g,t} = \sum_i \beta_{i,g,t} X_i + \beta_{\text{age},g,t} A + \epsilon \quad (5)$$

530 Where  $A$  is the normalized age of an individual. Coefficients 580  
 531 were fit using elastic net regularization, as above, which sets 581  
 532 coefficients for non-informative predictors to zero. The sign 582  
 533 of the fitted age coefficient ( $\beta_{\text{age},g,t}$ ), when nonzero, reflects 583  
 534 whether the gene in that tissue is expressed more in young 584  
 535 (negative coefficient) or old (positive coefficient) individuals. 585  
 536 We also evaluated the training set  $R^2$  using the fit model sep- 586  
 537 arately for genetics (across all SNPs in the model) and age. 587  
 538 To check consistency of tissue-specific gene expression her- 588  
 539 itability estimates from our model and the original PrediX- 589  
 540 can model trained on GTEx data, we evaluate Pearson's  $r$  be- 590  
 541 tween our heritability estimates and those of PrediXcan (Fig. 591  
 542 S7), using heritability estimates from the original PrediXcan 592  
 543 model available in PredictDB. 593

544 **Tissue specificity of age and genetic associations.** 594  
 545 We evaluated the variability of age and genetic associations 595  
 546 across tissues using a measure of tissue specificity for age 596  
 547

and genetic  $R^2$  (28). We measured the tissue-specificity of a  
 gene  $g$ 's variance explained  $R_g^2$  using the following metric:

$$S_g = \frac{\sum_{t=1}^n \left( 1 - \frac{R_{g,t}^2}{R_{g,\text{max}}^2} \right)}{n-1} \quad (6)$$

Where  $n$  is the total number of tissues,  $R_{g,t}^2$  is the variance  
 explained by either age or genetics for the gene  $g$  in tissue  $t$   
 and  $R_{g,\text{max}}^2$  is the maximum variance explained for the gene  $g$  over all  
 tissues. This metric can be thought of as the average reduction  
 in variance explained relative to the maximum variance  
 explained across tissues for a given gene. The metric ranges  
 from 0 to 1, with 0 representing ubiquitously high genetic or  
 age  $R^2$  and 1 representing only one tissue with nonzero ge-  
 netic or age  $R^2$  for a given gene. We calculate  $S_g$  separately  
 for  $R_{\text{age}}^2$  and  $R_{\text{genetics}}^2$  across all genes.

**Functional constraint analysis.** We quantified gene con-  
 straint using probability of loss of function intolerance (pLI)  
 from gnomAD 2.1.1 (18). We analyzed the relationships be-  
 tween pLI vs  $\beta_{\text{age}}$  and pLI vs heritability across genes. For  
 these analyses, genes were only included if age or genetics  
 were predictive of gene expression ( $R^2 > 0$ ) for that gene. For  
 genes with  $R^2 > 0$ , we used linear regression to determine the  
 direction of the relationship between pLI and  $\beta_{\text{age}}$  and heri-  
 tability for each tissue. The F-statistic was used to determine  
 whether pLI was significantly related to these two model out-  
 puts. For pLI vs  $\beta_{\text{age}}$ , a significant negative slope was consid-  
 ered a Medawar trend (consistent with the Medawar hypothe-  
 sis) and a significant positive slope a non-Medawar trend. We  
 also analyzed the evolutionary constraint metric dN/dS (19)  
 and its tissue-specific relationship with  $\beta_{\text{age}}$  by determining  
 the slope and significance of the linear regression, as above.

**Non-Medawar tissue analysis.** To explore the non-  
 Medawar trend in some tissues, we assessed the distribution  
 of  $\beta_{\text{age}}$  across Medawar and non-Medawar tissues for genes  
 within each of the 50 MSigDB hallmark pathways (20). Sig-  
 nificant differences between the distributions were called us-  
 ing a t-test, and p-values were adjusted for multiple hypothe-  
 sis testing using a Benjamini-Hochberg correction.

**Code availability.** All analyses were performed in R ver-  
 sion 4.0.2 and Python 3.6. All code is available online at  
[https://github.com/sudmantlab/gene\\_expression\\_aging](https://github.com/sudmantlab/gene_expression_aging).

#### ACKNOWLEDGEMENTS

This work was supported by the National Institute of General Medical Sciences grant R35GM142916 to P.H.S. and the National Human Genome Research Institute grant R00HG009677 to N.M.I.

#### AUTHOR CONTRIBUTIONS

RY, RC, JMV, HS, PS, and PHS performed all analysis. RY, RC, NMI, and PHS wrote the manuscript. PHS and NMI supervised the project. PHS conceived of the project.

#### Bibliography

1. B Charlesworth, Fisher, medawar, hamilton and the evolution of aging. *Genetics* 156, 927–931 (2000).
2. MR Rose, CL Rauser, G Benford, M Matos, LD Mueller, HAMILTONS FORCES OF NATURAL SELECTION AFTER FORTY YEARS. *Evolution* 61, 1265–1276 (2007).

- 598 3. A Viñuela, et al., Age-dependent changes in mean and variance of gene expression across  
599 tissues in a twin cohort. *Hum. Mol. Genet.* **27**, 732–741 (2017).
- 600 4. B Balliu, et al., Genetic regulation of gene expression and splicing during a 10-year period  
601 of human aging. *Genome Biol.* **20** (2019).
- 602 5. M Somel, P Khaitovich, S Bahn, S Pääbo, M Lachmann, Gene expression becomes het-  
603 erogeneous with age. *Curr. Biol.* **16**, R359–R360 (2006).
- 604 6. S Wang, et al., Single-cell transcriptomic atlas of primate ovarian aging. *Cell* **180**, 585–  
605 600.e19 (2020).
- 606 7. CP Martinez-Jimenez, et al., Aging increases cell-to-cell transcriptional variability upon im-  
607 mune stimulation. *Science* **355**, 1433–1436 (2017).
- 608 8. C Cheng, M Kirkpatrick, Molecular evolution and the decline of purifying selection with age.  
609 *Nat. Commun.* **12** (2021).
- 610 9. K Jia, C Cui, Y Gao, Y Zhou, Q Cui, An analysis of aging-related genes derived from the  
611 genotype-tissue expression project (GTEx). *Cell Death Discov.* **4** (2018).
- 612 10. Genetic effects on gene expression across human tissues. *Nature* **550**, 204–213 (2017).
- 613 11. O Stegle, L Parts, R Durbin, J Winn, A bayesian framework to account for complex non-  
614 genetic factors in gene expression levels greatly increases power in eQTL studies. *PLoS*  
615 *Comput. Biol.* **6**, e1000770 (2010).
- 616 12. PH Sudmant, MS Alexis, CB Burge, Meta-analysis of RNA-seq expression data across  
617 species, tissues and studies. *Genome Biol.* **16** (2015).
- 618 13. P Sen, PP Shah, R Nativio, SL Berger, Epigenetic mechanisms of longevity and aging. *Cell*  
619 **166**, 822–839 (2016).
- 620 14. ER Gamazon, et al., A gene-based association method for mapping traits using reference  
621 transcriptome data. *Nat. Genet.* **47**, 1091–1098 (2015).
- 622 15. A Subramanian, et al., Gene set enrichment analysis: A knowledge-based approach for  
623 interpreting genome-wide expression profiles. *Proc. Natl. Acad. Sci.* **102**, 15545–15550  
624 (2005).
- 625 16. S Rath, et al., Mitocarta3.0: an updated mitochondrial proteome now with sub-organelle  
626 localization and pathway annotations. *Nucleic Acids Res.* **49**, D1541–D1547 (2020).
- 627 17. R Cui, et al., Relaxed selection limits lifespan by increasing mutation load. *Cell* **178**,  
628 385–399.e20 (2019).
- 629 18. M Lek, et al., Analysis of protein-coding genetic variation in 60,706 humans. *Nature* **536**,  
630 285–291 (2016).
- 631 19. M Gayà-Vidal, M Albà, Uncovering adaptive evolution in the human lineage. *BMC Genomics*  
632 **15**, 599 (2014).
- 633 20. A Liberzon, et al., The molecular signatures database hallmark gene set collection. *Cell*  
634 *Syst.* **1**, 417–425 (2015).
- 635 21. N Almanzar, et al., A single-cell transcriptomic atlas characterizes ageing tissues in the  
636 mouse. *Nature* **583**, 590–595 (2020).
- 637 22. P Cheung, et al., Single-cell chromatin modification profiling reveals increased epigenetic  
638 variations with aging. *Cell* **173**, 1385–1397.e14 (2018).
- 639 23. S Srivastava, The mitochondrial basis of aging and age-related disorders. *Genes* **8**, 398  
640 (2017).
- 641 24. S Tahmasebi, A Khoutorsky, MB Mathews, N Sonenberg, Translation deregulation in human  
642 disease. *Nat. Rev. Mol. Cell Biol.* **19**, 791–807 (2018).
- 643 25. H Mostafavi, et al., Variable prediction accuracy of polygenic scores within an ancestry  
644 group. *eLife* **9** (2020).
- 645 26. M Wainberg, et al., Opportunities and challenges for transcriptome-wide association stud-  
646 ies. *Nat. Genet.* **51**, 592–599 (2019).
- 647 27. JH Friedman, T Hastie, R Tibshirani, Regularization paths for generalized linear models via  
648 coordinate descent. *J. Stat. Softw.* **33**, 122 (2010).
- 649 28. I Yanai, et al., Genome-wide midrange transcription profiles reveal expression level relation-  
650 ships in human tissue specification. *Bioinformatics* **21**, 650–659 (2004).

651 **Supplementary Figures**

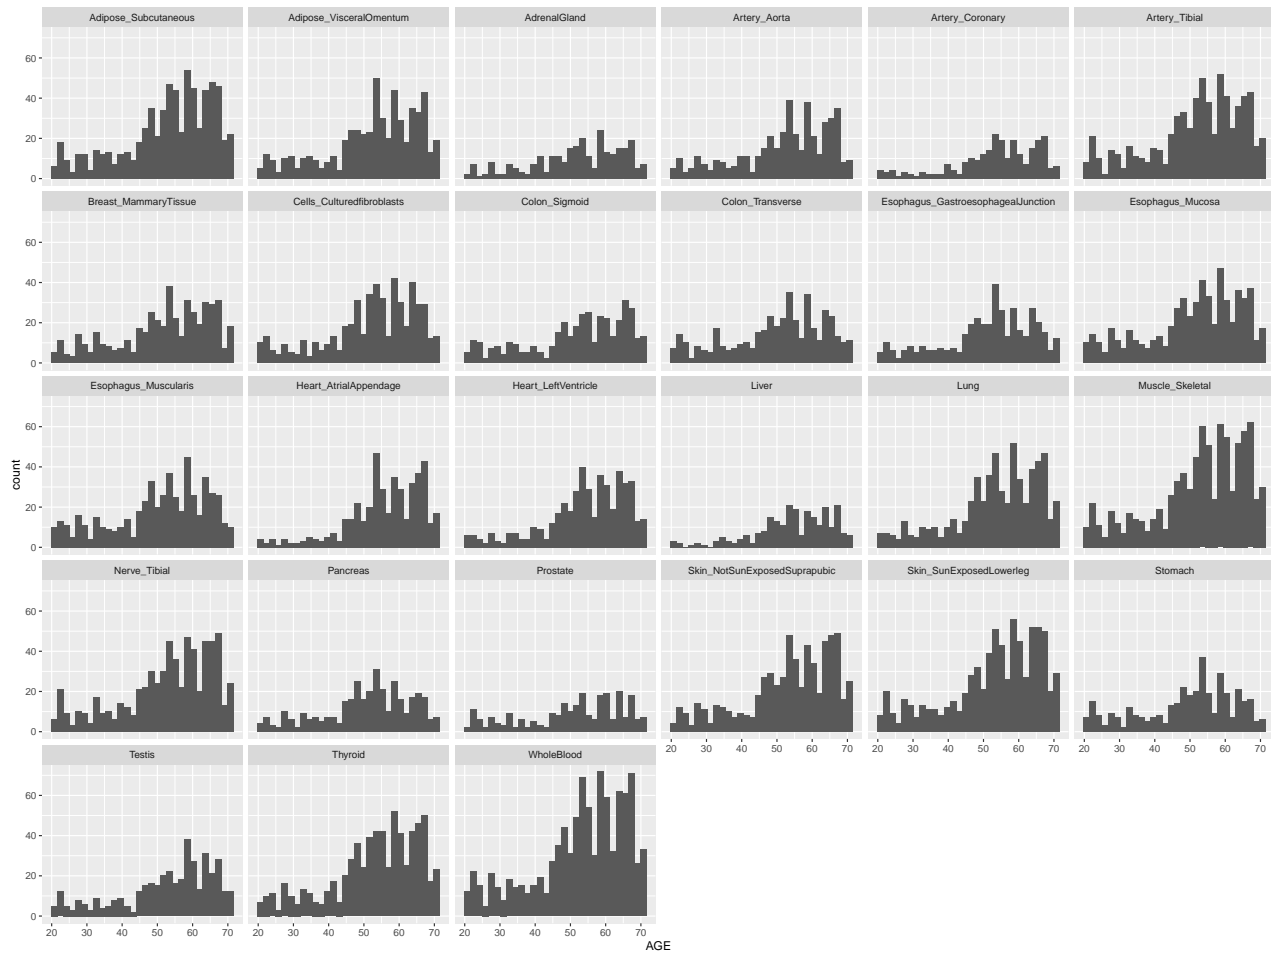

**Fig S 1. Sample distribution of each GTEx tissue by age**

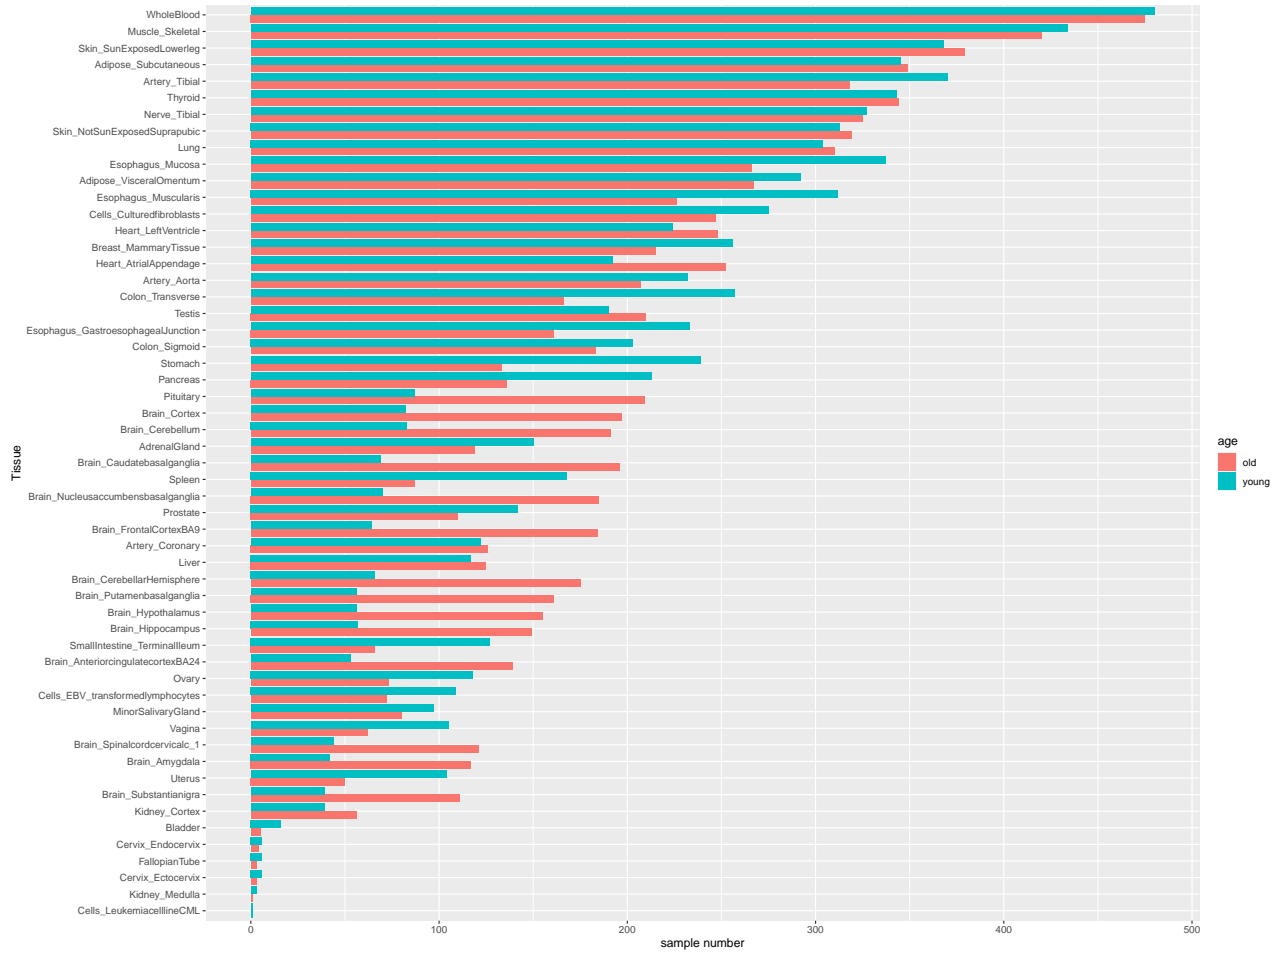

**Fig S 2. Sample number for individuals above and below the median age by tissue for 47 GTEx tissues**

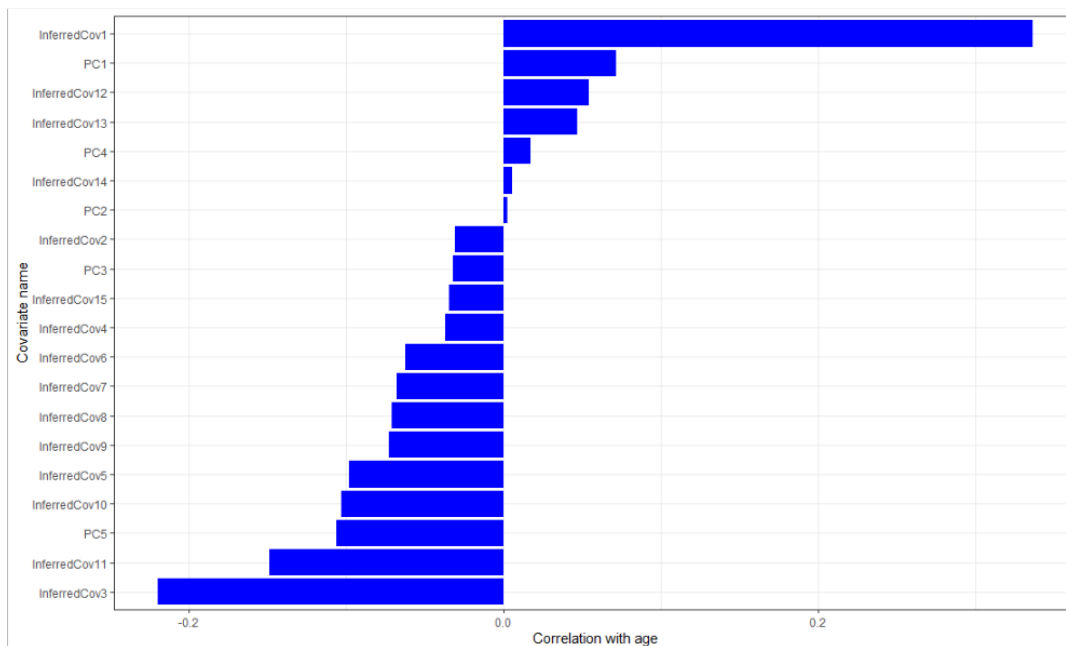

**Fig S 3. Correlation of GTEx covariates with age.**



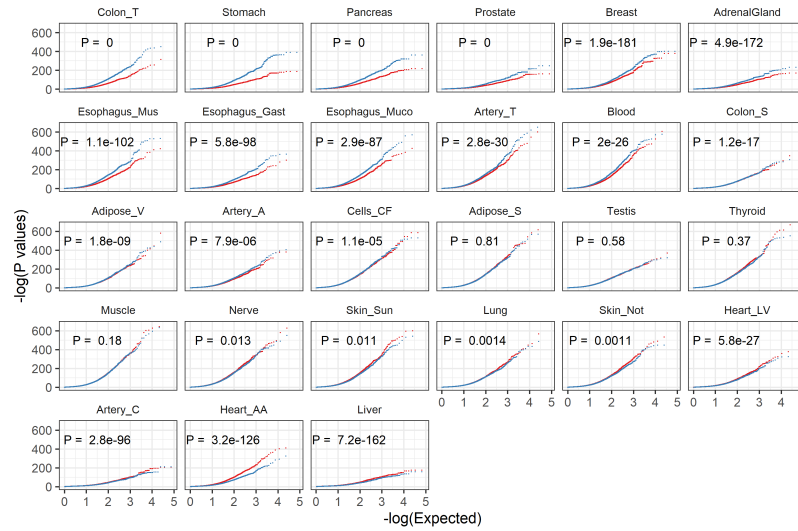

**Fig S 4.** QQ plot of eQTL p-values for old (red) and young (blue) cohorts across 27 tissues using GTEx PEER factors. Significant differences between p-value distributions annotated for each tissue.

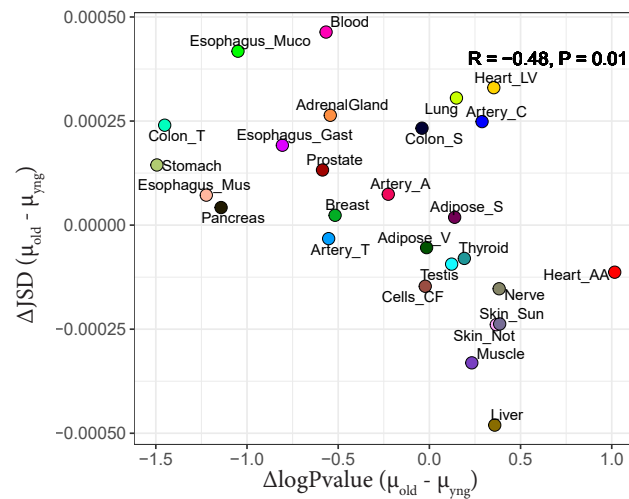

**Fig S 5.** Scatter plot showing the correlation between the difference in average JSD between young and old individuals and difference in eQTL log(p-value) between young and old

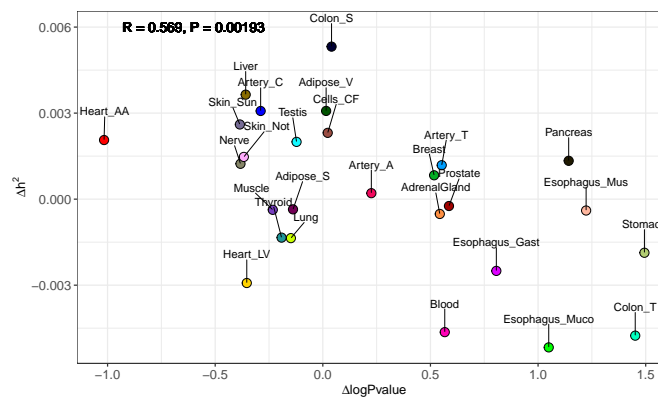

**Fig S 6.** High correspondence of age-related changes in gene expression associations for single SNP and multi-SNP models. Scatter plot showing the correlation between the difference in heritability estimated by the multi-SNP linear model (PrediXcan) in young and old individuals and difference in eQTL log(p-value) in young and old individuals

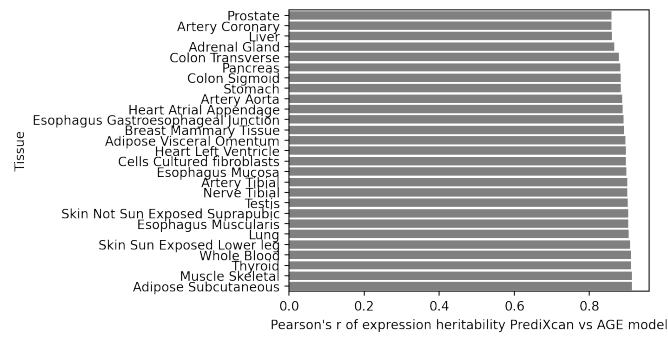

Fig S 7. Pearson's r of heritability estimate from PrediXcan (PredictDB) vs our model for each tissue

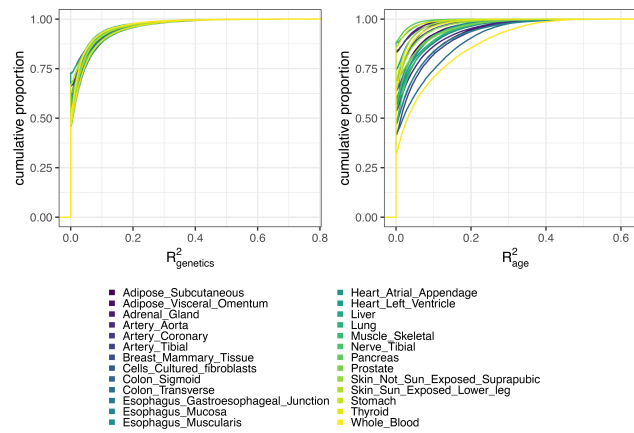

Fig S 8. Cumulative distribution of  $R^2_{age}$  and  $h^2$  for all modeled genes within 27 tissues.

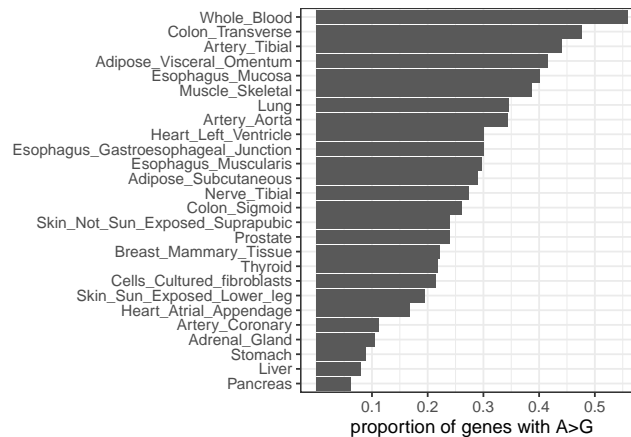

Fig S 9. Proportion of genes within a tissue that have  $R^2_{age} > h^2$

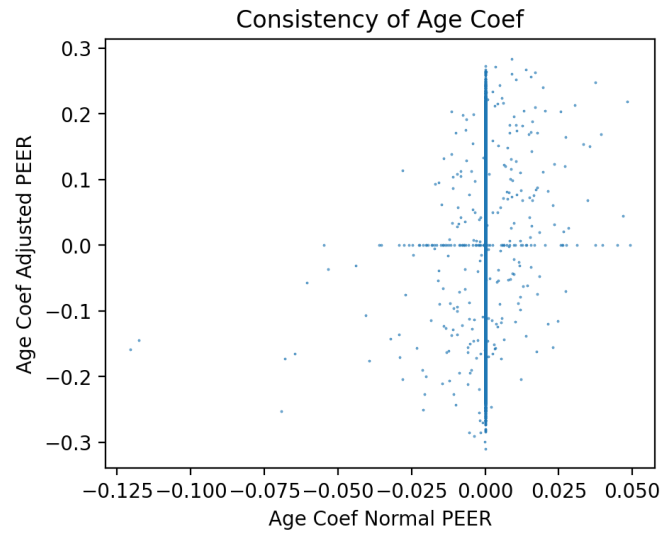

Fig S 10. Scatter plot of each gene's  $\beta_{\text{age}}$  of multiSNP model using GTEx PEER factors vs age-independent PEER factors for Whole Blood

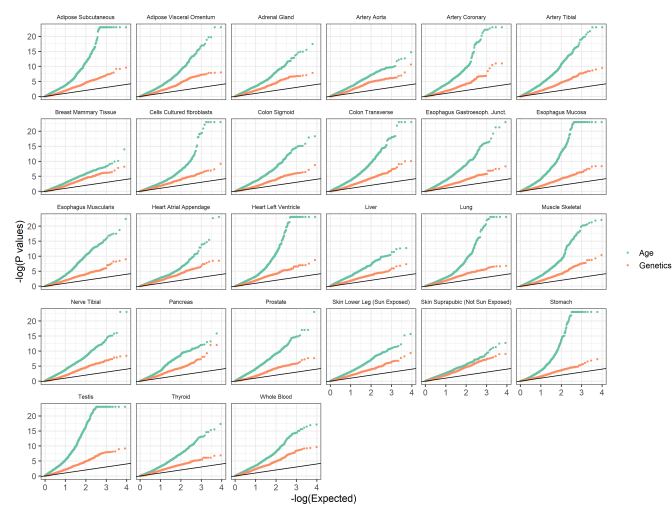

Fig S 11. GO gene set enrichment P-values across all tissue for genes ranked by either  $h^2$  or  $R^2_{\text{age}}$

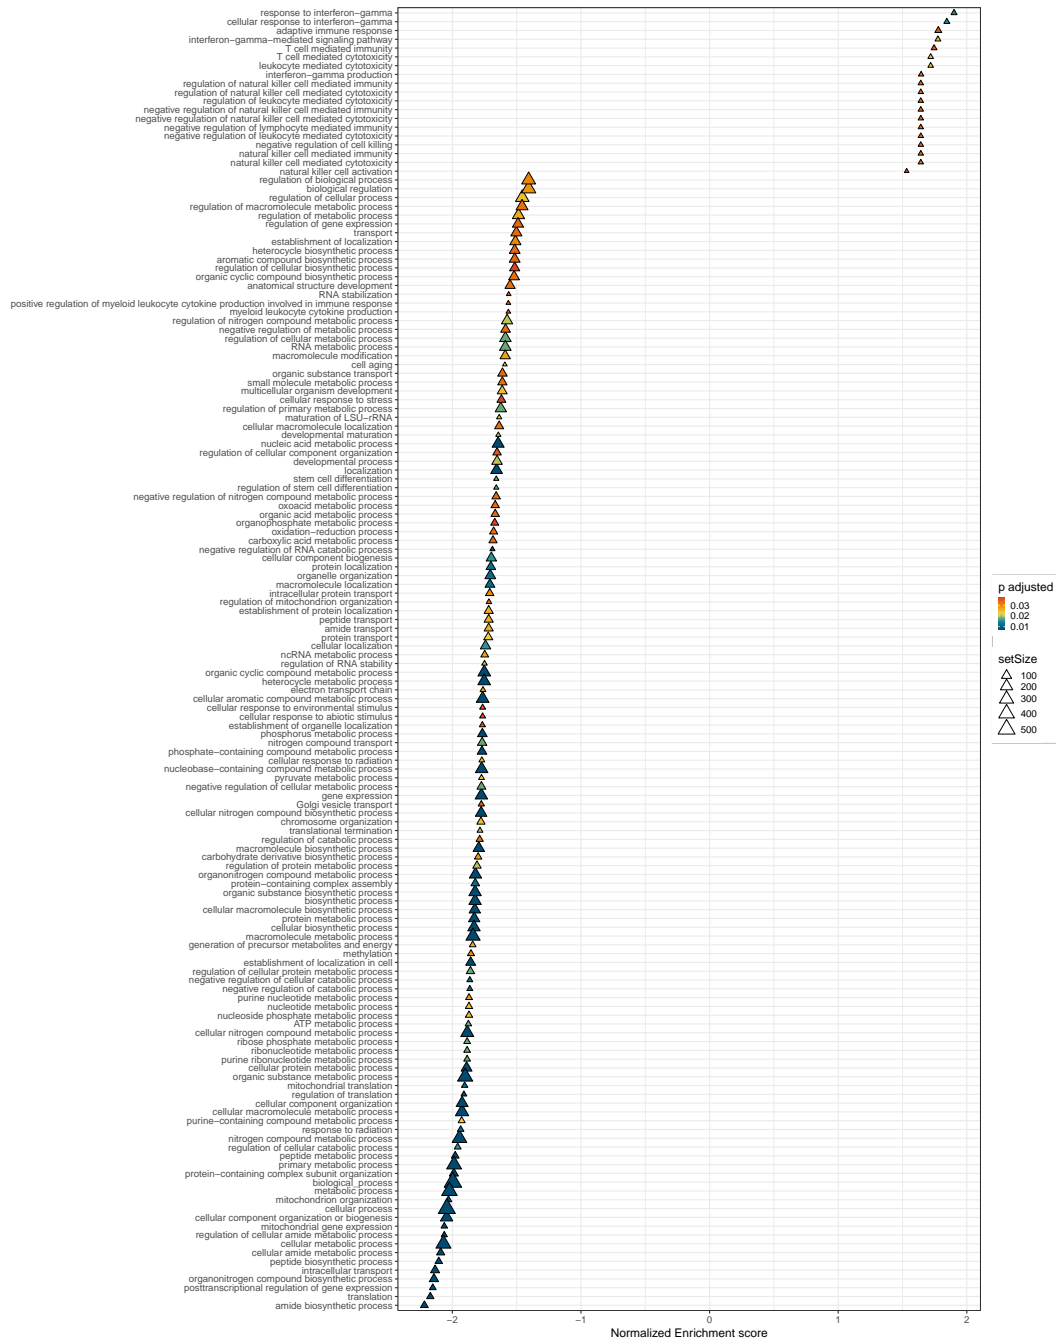

Fig S 12. GO Biological Processes common enrichment in all tissues with genes ranked by average  $\beta_{Age}$  (FDR 0.05)

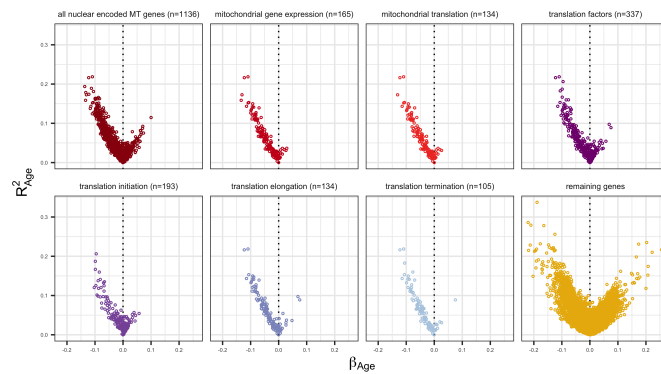

Fig S 13. Relationship between the average  $\beta_{Age}$  and average  $R^2$  across tissues for genes associated with specific mitochondrial and translation pathways



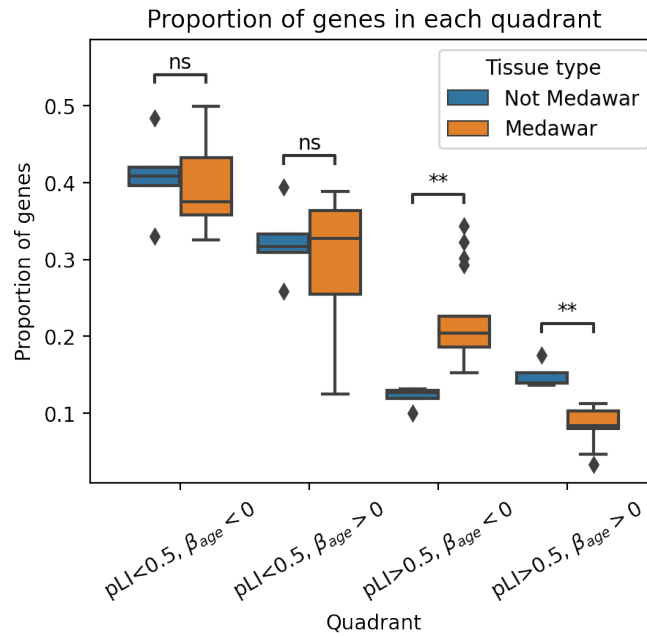

**Fig S 14. More highly constrained, late expressed genes in non-Medawar tissues than in Medawar tissues.** We plot the proportion of genes within each quadrant of the gene constraint (pLI) vs. age of expression ( $\beta_{age}$ ) plots stratified by whether the tissue showed a significant Medawar or Non-Medawar trend.

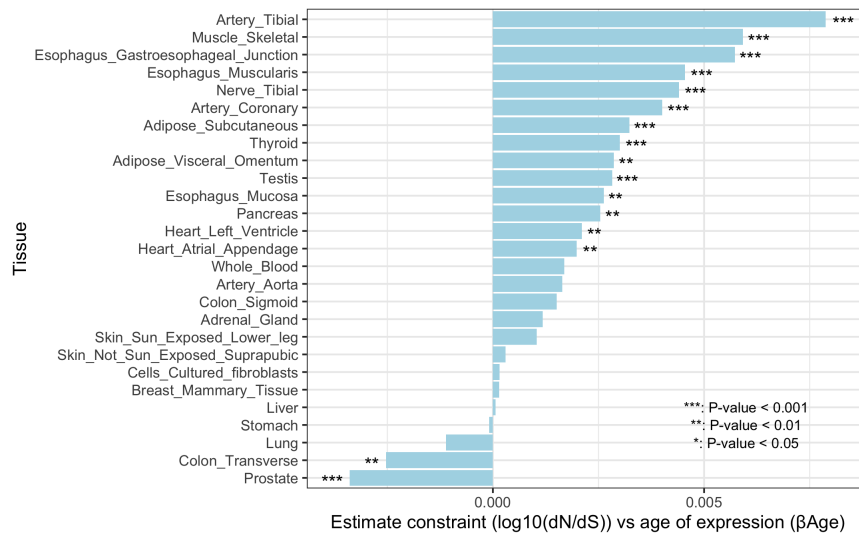

**Fig S 15. Linear regression estimates of evolutionary constraint (dN/dS data from ortholog comparison between 8,175 human and chimpanzee genes) vs age-associated gene expression ( $\beta_{age}$ ) across tissues for  $R^2_{age} > 0$ . 10/27 tissues have significant p-values (p-value < 0.001)**

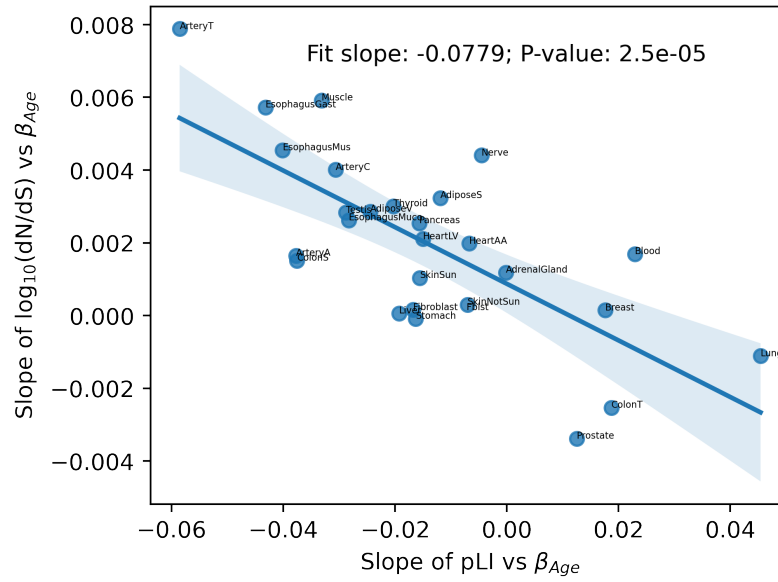

**Fig S 16. Consistency of Medawarian trend measures.** We plot the slope of gene constraint metrics (pLI and dN/dS) vs  $\beta_{Age}$  for each tissue

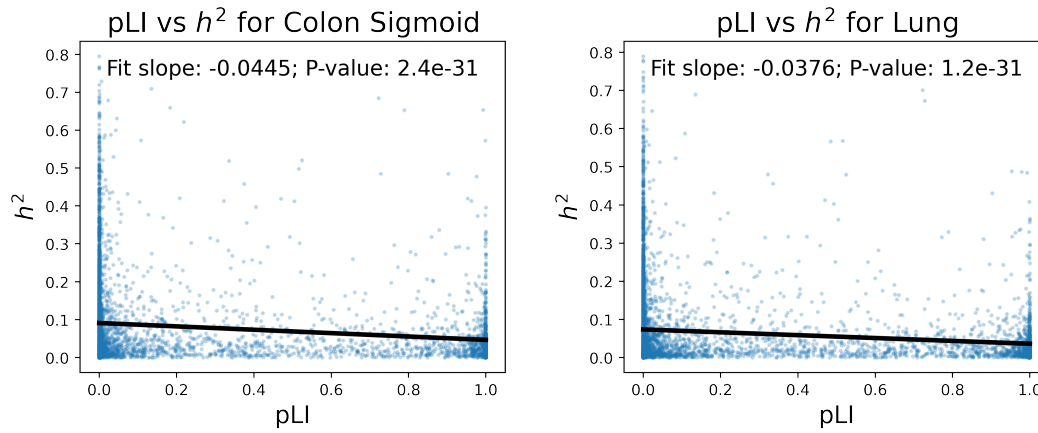

**Fig S 17. Gene expression heritability vs pLI for two tissues**

| TISSUE                             | #(old individuals) | #(young individuals) |
|------------------------------------|--------------------|----------------------|
| Adipose_Subcutaneous               | 349                | 345                  |
| Adipose_VisceralOmentum            | 267                | 292                  |
| AdrenalGland                       | 119                | 150                  |
| Artery_Aorta                       | 207                | 232                  |
| Artery_Coronary                    | 126                | 122                  |
| Artery_Tibial                      | 318                | 370                  |
| Breast_MammaryTissue               | 215                | 256                  |
| Cells_Culturedfibroblasts          | 247                | 275                  |
| Colon_Sigmoid                      | 183                | 203                  |
| Colon_Transverse                   | 166                | 257                  |
| Esophagus_GastroesophagealJunction | 161                | 233                  |
| Esophagus_Mucosa                   | 266                | 337                  |
| Esophagus_Muscularis               | 226                | 312                  |
| Heart_AtrialAppendage              | 252                | 192                  |
| Heart_LeftVentricle                | 248                | 224                  |
| Liver                              | 125                | 117                  |
| Lung                               | 310                | 304                  |
| Muscle_Skeletal                    | 420                | 434                  |
| Nerve_Tibial                       | 325                | 327                  |
| Pancreas                           | 136                | 213                  |
| Prostate                           | 110                | 142                  |
| Skin_NotSunExposedSuprapubic       | 319                | 313                  |
| Skin_SunExposedLowerleg            | 379                | 368                  |
| Stomach                            | 133                | 239                  |
| Testis                             | 210                | 190                  |
| Thyroid                            | 344                | 343                  |
| WholeBlood                         | 475                | 480                  |

Table S 1. Number of old and young individuals per tissue

| Tissue                              | Short name    |
|-------------------------------------|---------------|
| Adipose_Subcutaneous                | AdiposeS      |
| Adipose_VisceralOmentum             | AdiposeV      |
| AdrenalGland                        | AdrenalGland  |
| Artery_Aorta                        | ArteryA       |
| Artery_Coronary                     | ArteryC       |
| Artery_Tibial                       | ArteryT       |
| Breast_Mammary_Tissue               | Breast        |
| Cells_Cultured_fibroblasts          | Fibroblast    |
| Colon_Sigmoid                       | ColonS        |
| Colon_Transverse                    | ColonT        |
| Esophagus_Gastroesophageal_Junction | EsophagusGast |
| Esophagus_Mucosa                    | EsophagusMuco |
| Esophagus_Muscularis                | EsophagusMus  |
| Heart_Atrial_Appendage              | HeartAA       |
| Heart_Left_Ventricle                | HeartLV       |
| Liver                               | Liver         |
| Lung                                | Lung          |
| Muscle_Skeletal                     | Muscle        |
| Nerve_Tibial                        | Nerve         |
| Pancreas                            | Pancreas      |
| Prostate                            | Prostate      |
| Skin_Not_Sun_Exposed_Suprapubic     | SkinNotSun    |
| Skin_Sun_Exposed_Lower_leg          | SkinSun       |
| Stomach                             | Stomach       |
| Testis                              | Testis        |
| Thyroid                             | Thyroid       |
| Whole_Blood                         | Blood         |

Table S 2. Tissues with short names
